# Supplementary material for: The Association of Maternal Weight Status throughout the Life-Course with the Development of Childhood Obesity: A Secondary Analysis of the Healthy Growth Study Data
Source: MDPI journal article supplement (doi:10.3390/nu15214602), 2023-10-29
Supplement: s1 [file s1]

**Supplementary Figure S1** Maternal weight status across the time-points; pre-pregnancy, gestational weight gain, and at their child's pre-adolescence.

**Maternal pre-pregnancy weight status ( $n = 2229$ )**      **Maternal gestational weight gain ( $n = 2228$ )**

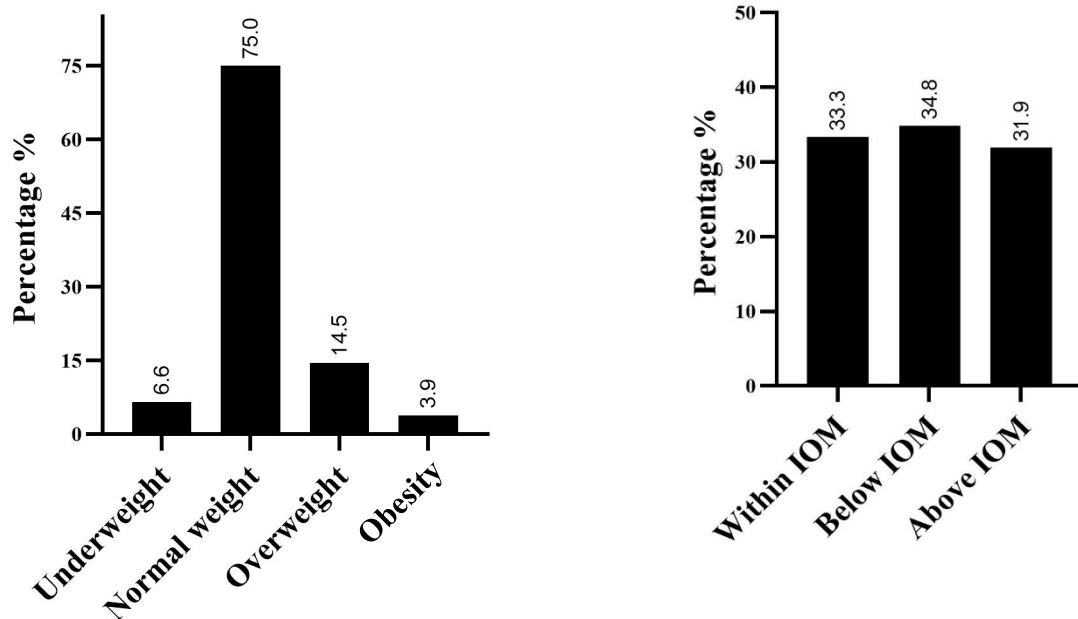

**Maternal weight status at their child's pre-adolescence ( $n = 2178$ )**

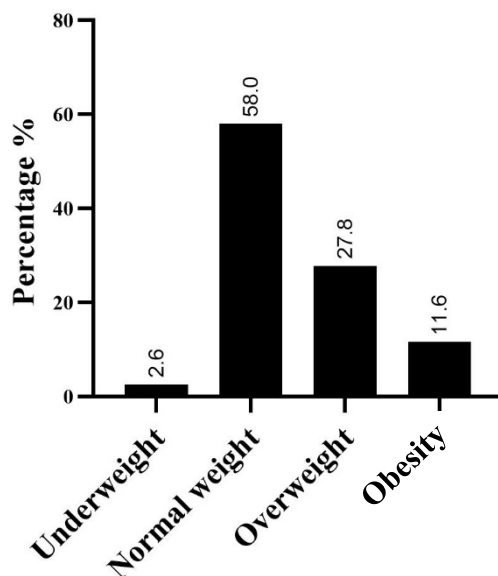

Abbreviations: n, sample size; IOM, Institute of Medicine. \*Based on recommendations by the IOM [46].

**Supplementary Figure S2** Prevalence of childhood obesity, across recommendation-based maternal weight trajectory groups, stratified by sex.

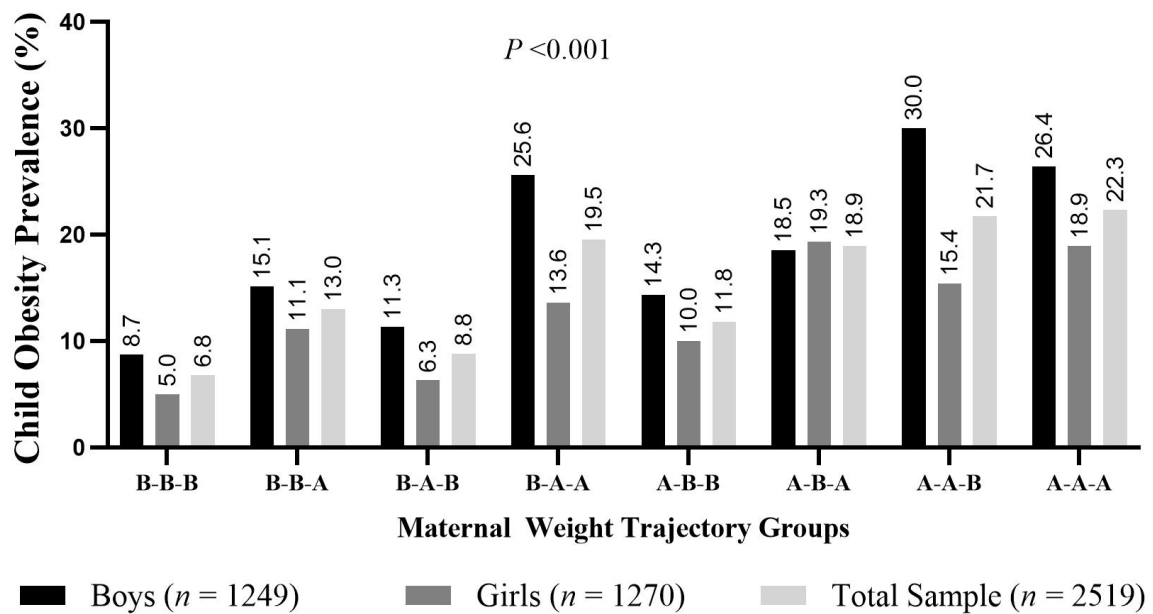

Abbreviations: %, percentage; *P*, *p* value (determined with a chi-square test); B, Below (includes maternal weight status as normal or below the WHO classification of adults according to BMI [45], or Institute of Medicine (IOM) recommendations [46]); A, Above (includes maternal weight status above the WHO (2000) classification of adults according to BMI thresholds (overweight/obesity) or IOM recommendations [46]); *n*, sample size.

Maternal weight trajectories groups have been combined based on recommended cut-off points for weight status at the following time-points pre-pregnancy and during pregnancy (gestational weight gain [based on the IOM recommendation [46]]), and, at their child's pre-adolescence, combined into 8 maternal weight trajectory groups.

**Supplementary Table S1** Behavioural descriptive characteristics of study participants

|                                                                  | Total Sample<br>( <i>n</i> = 2519 <sup>a</sup> ) | Boys<br>( <i>n</i> = 1249) | Girls<br>( <i>n</i> = 1270) | <i>P</i> -value     |
|------------------------------------------------------------------|--------------------------------------------------|----------------------------|-----------------------------|---------------------|
| <b>Dietary Intake</b>                                            | <u>Mean ± SD</u>                                 | <u>Mean ± SD</u>           | <u>Mean ± SD</u>            |                     |
| Total energy (kcal/day)                                          | 1750.3 ± 450.9                                   | <b>1829.0 ± 459.6</b>      | <b>1672.8 ± 428.6</b>       | <0.001*             |
| % of energy derived from total fat                               | 40.9 ± 7.17                                      | 40.6 ± 7.10                | 41.2 ± 7.24                 | 0.073*              |
| % of energy derived from total SFA intake                        | 15.0 ± 3.51                                      | 14.9 ± 3.4                 | 15.1 ± 3.61                 | 0.470*              |
| % of energy derived from total MUFA intake                       | 18.5 ± 5.02                                      | 18.4 ± 5.02                | 15.1 ± 5.02                 | 0.556*              |
| % of energy derived from total PUFA intake                       | 5.17 ± 3.85                                      | <b>4.90 ± 3.01</b>         | <b>5.43 ± 4.51</b>          | <0.001*             |
| % of energy derived from total carbohydrates intake              | 45.6 ± 8.34                                      | 45.7 ± 8.19                | 45.5 ± 8.50                 | 0.480*              |
| % of energy derived from total protein intake                    | 15.7 ± 3.43                                      | <b>15.8 ± 3.3</b>          | <b>15.5 ± 3.58</b>          | <b>0.002*</b>       |
| <b>Physical Activity</b>                                         | <u>Mean ± SD</u>                                 | <u>Mean ± SD</u>           | <u>Mean ± SD</u>            |                     |
| Daily organised moderate-to-vigorous physical activity (min/day) | 24.0 ± 38.0                                      | <b>28.4 ± 45.6</b>         | <b>19.6 ± 28.6</b>          | <0.001 <sup>†</sup> |
| Daily moderate-to-vigorous physical activity (min/day)           | 68.0 ± 63.1                                      | <b>75.2 ± 65.7</b>         | <b>58.2 ± 58.0</b>          | <0.001 <sup>†</sup> |
| Daily steps                                                      | 13,189.1 ± 5143.0                                | <b>14,631.0 ± 5535.3</b>   | <b>11,782.1 ± 4286.4</b>    | <0.001 <sup>†</sup> |
| Screen time (hours/day)                                          | 3.02 ± 1.77                                      | 3.02 ± 1.77                | 3.02 ± 1.77                 | 0.951 <sup>†</sup>  |

Abbreviations: %, percentage; ±, plus/minus; SD, Standard Deviation; SFA, Saturated fat; MUFA, monounsaturated fat; PUFA, Polyunsaturated fatty acids.

<sup>a</sup>Subsample with selected cases, filtered for energy intake >800 <3000 kilocalories.

\*All *p*-values related to gender differences of dietary intake were derived from Independent Sample T-Test using the logarithm of the examined outcome measures.

<sup>†</sup>All *p*-values related to gender differences of physical activity were derived from the non-parametric Mann-Whitney U Test.

Results in bold indicate statistical significance (*p* < 0.05).

**Supplementary Table S2** Crude odds ratios for the association of maternal weight status and child obesity status, stratified by sex

| Maternal Weight Status                       | Total Sample*<br>(OR [95%CI]) | Boys*<br>(OR [95%CI])    | Girls*<br>(OR [95%CI])    |
|----------------------------------------------|-------------------------------|--------------------------|---------------------------|
| Maternal Pre-pregnancy BMI                   | ( <i>n</i> = 2213)            | ( <i>n</i> = 1082)       | ( <i>n</i> = 1131)        |
| Normal Weight                                | Reference                     | Reference                | Reference                 |
| Underweight                                  | 0.45 [0.21, 0.99]             | 0.50 [0.199, 1.28]       | 0.35 [0.09, 1.48]         |
| Overweight                                   | <b>1.91 [1.37, 2.66]</b>      | <b>1.71 [1.09, 2.70]</b> | <b>2.29 [1.41, 3.71]</b>  |
| Obesity                                      | <b>4.20 [2.59, 6.81]</b>      | <b>3.61 [1.82, 7.11]</b> | <b>5.18 [2.58, 10.41]</b> |
| Gestational Weight Gain                      | ( <i>n</i> = 2213)            | ( <i>n</i> = 1082)       | ( <i>n</i> = 1131)        |
| Within IOM                                   | Reference                     | Reference                | Reference                 |
| Below IOM                                    | 0.78 [0.55, 1.09]             | 0.70 [0.45, 1.11]        | 0.91 [0.54, 1.53]         |
| Above IOM                                    | <b>1.47 [1.08, 2.00]</b>      | <b>1.52 [1.01, 2.27]</b> | 1.46 [0.89, 2.37]         |
| Mothers BMI at their child's pre-adolescence | ( <i>n</i> = 2162)            | ( <i>n</i> = 1052)       | ( <i>n</i> = 1110)        |
| Normal weight                                | Reference                     | Reference                | Reference                 |
| Under weight                                 | 0.22 [0.03, 1.61]             | 0.33 [0.04, 2.49]        | 0.00                      |
| Overweight                                   | <b>2.06 [1.52, 2.79]</b>      | <b>1.89 [1.27, 2.83]</b> | <b>2.37 [1.48, 3.79]</b>  |
| Obesity                                      | <b>3.61 [2.53, 5.16]</b>      | <b>3.34 [2.06, 5.42]</b> | <b>4.18 [2.44, 7.15]</b>  |

Abbreviations: OR, Odds Ratio; 95%CI, 95% Confidence Interval; IOM, Institute of Medicine (Based on recommendations by the IOM [46].

\*Subsample with selected cases, filtered for energy intake >800 <3000 kilocalories

Results in bold indicate statistically significant odds ratios ( $p < 0.05$ ).

**Supplementary Table S3** Crude odds ratios for the association of recommendation-based maternal weight trajectory groups and child obesity

| Maternal Weight<br>Trajectory Group <sup>‡</sup> | Total Sample*<br>(OR [95%CI])<br>( <i>n</i> = 2162) | Boys*<br>(OR [95%CI])<br>( <i>n</i> = 1052) | Girls*<br>(OR [95%CI])<br>( <i>n</i> = 1110) |
|--------------------------------------------------|-----------------------------------------------------|---------------------------------------------|----------------------------------------------|
| Below-below-below                                | Reference                                           | Reference                                   | Reference                                    |
| Below-below-above                                | <b>2.04 [1.36, 3.07]</b>                            | <b>1.86 [1.08, 3.19]</b>                    | <b>2.38 [1.30, 4.47]</b>                     |
| Below-above-below                                | 1.31 [0.82, 2.08]                                   | 1.33 [0.74, 2.38]                           | 1.27 [0.59, 2.72]                            |
| Below-above-above                                | <b>3.30 [2.07, 5.26]</b>                            | <b>3.61 [1.98, 6.58]</b>                    | <b>2.99 [1.40, 6.38]</b>                     |
| Above-below-below                                | 1.82 [0.41, 8.12]                                   | 1.74 [0.21, 14.84]                          | 2.12 [0.26, 17.39]                           |
| Above-below-above                                | <b>3.18 [2.01, 5.04]</b>                            | <b>2.38 [1.25, 4.54]</b>                    | <b>4.56 [2.33, 8.91]</b>                     |
| Above-above-below                                | 3.79 [1.36, 10.53]                                  | <b>4.48 [1.12, 18.00]</b>                   | 3.46 [0.73, 16.50]                           |
| Above-above-above                                | <b>3.91 [2.56, 5.96]</b>                            | <b>3.76 [2.12, 6.68]</b>                    | <b>4.43 [2.34, 8.37]</b>                     |

Abbreviations: OR, Odds Ratio; 95%CI, 95% Confidence Interval; B, Below (includes maternal weight status as normal or below the WHO classification of adults according to BMI [45], or Institute of Medicine (IOM) recommendations [46]); A, Above (includes maternal weight status above the WHO classification of adults according to BMI thresholds (overweight/obesity) [45] or IOM recommendations [46]).

<sup>‡</sup>Maternal weight trajectories groups have been combined based on recommended cut-off points for weight status at the following time-points pre-pregnancy and during pregnancy (gestational weight gain [based on the IOM recommendation [46]]), and, at their child's pre-adolescence, combined into 8 maternal weight trajectory groups.

\*Subsample with selected cases, filtered for energy intake >800 <3000 kilocalories.

Results in bold indicate statistically significant odds ratios ( $p < 0.05$ ).

**Supplementary Table S4** Adjusted<sup>a</sup> odds ratios for the association of recommendation-based maternal weight trajectory groups and child obesity status,

| Maternal Weight<br>Trajectory Group <sup>‡</sup> | Total Sample<br>(OR [95%CI])<br>( <i>n</i> = 2039 <sup>*</sup> ) | Boys<br>(OR [95%CI])<br>( <i>n</i> = 993) | Girls<br>(OR [95%CI])<br>( <i>n</i> = 1046) |
|--------------------------------------------------|------------------------------------------------------------------|-------------------------------------------|---------------------------------------------|
| Below-below-below                                | Reference                                                        | Reference                                 | Reference                                   |
| Below-below-above                                | <b>1.86 [1.21, 2.84]</b>                                         | 1.73 [0.98, 3.06]                         | <b>2.25 [1.16, 4.39]</b>                    |
| Below-above-below                                | 1.22 [0.75, 1.96]                                                | 1.29 [0.70, 2.38]                         | 1.31 [0.60, 2.87]                           |
| Below-above-above                                | <b>2.90 [1.78, 4.74]</b>                                         | <b>3.16 [1.67, 5.99]</b>                  | <b>2.77 [1.23, 6.21]</b>                    |
| Above-below-below                                | 1.61 [0.34, 7.71]                                                | 1.07 [0.11, 10.43]                        | 1.96 [0.209, 18.419]                        |
| Above-below-above                                | <b>2.74 [1.65, 4.54]</b>                                         | 1.88 [0.91, 3.90]                         | <b>4.37 [2.09, 9.12]</b>                    |
| Above-above-below                                | <b>3.24 [1.10, 9.55]</b>                                         | 3.73 [0.85, 16.31]                        | 3.66 [0.69, 19.39]                          |
| Above-above-above                                | <b>3.07 [1.95, 4.85]</b>                                         | <b>2.43 [1.28, 4.63]</b>                  | <b>4.62 [2.34, 9.12]</b>                    |

Abbreviations: OR, Odds Ratio; 95% CI, 95% Confidence Interval; B, Below (includes maternal weight status as normal or below the WHO classification of adults according to BMI [45], or Institute of Medicine (IOM) recommendations [46]); A, Above (includes maternal weight status above the WHO classification of adults according to BMI thresholds (overweight/obesity) [45] or IOM recommendations [46]).

<sup>a</sup>The model was adjusted for infant's weight at birth (grams), growth velocity, infant feeding history, gestational age, average dietary energy intake (Kcal/day), daily moderate-to-vigorous physical activity (minutes), mother's age, mother's education, mother's age at birth, father's education, father's age, and fathers BMI.

<sup>‡</sup>Maternal weight trajectories groups have been combined based on recommended cut-off points for weight status at the following time-points pre-pregnancy and during pregnancy (gestational weight gain [based on the IOM recommendation [46]]), and, at their child's pre-adolescence, combined into 8 maternal weight trajectory groups.

<sup>\*</sup>Subsample with selected cases, filtered for energy intake >800 <3000 kilocalories.

Results in bold indicate statistically significant odds ratios ( $p < 0.05$ ).
